# Supplementary material for: The one dimensional chain structures of vanadyl glycolate and vanadyl acetateElectronic supplementary information (ESI) available: difference plots and reflections lists for VO(CH3COO)2 and VO(OCH2CH2O). See http://www.rsc.org/suppdata/jm/b2/b208100h/
Source: Royal Society of Chemistry journal article supplement (doi:10.1039/b208100h), 2003-01-01
Supplement: b208100h.doc [file b208100h.doc]

Fig. S1. Rietveld refinement plots for VO(CH3COO)2 (a) and VO(OCH2CH2O) (b). The observed and calculated patterns are shown on the top as the circles and solid line respectively. Their difference is shown at the bottom. The vertical lines in the middle shows reflections positions.

(a)


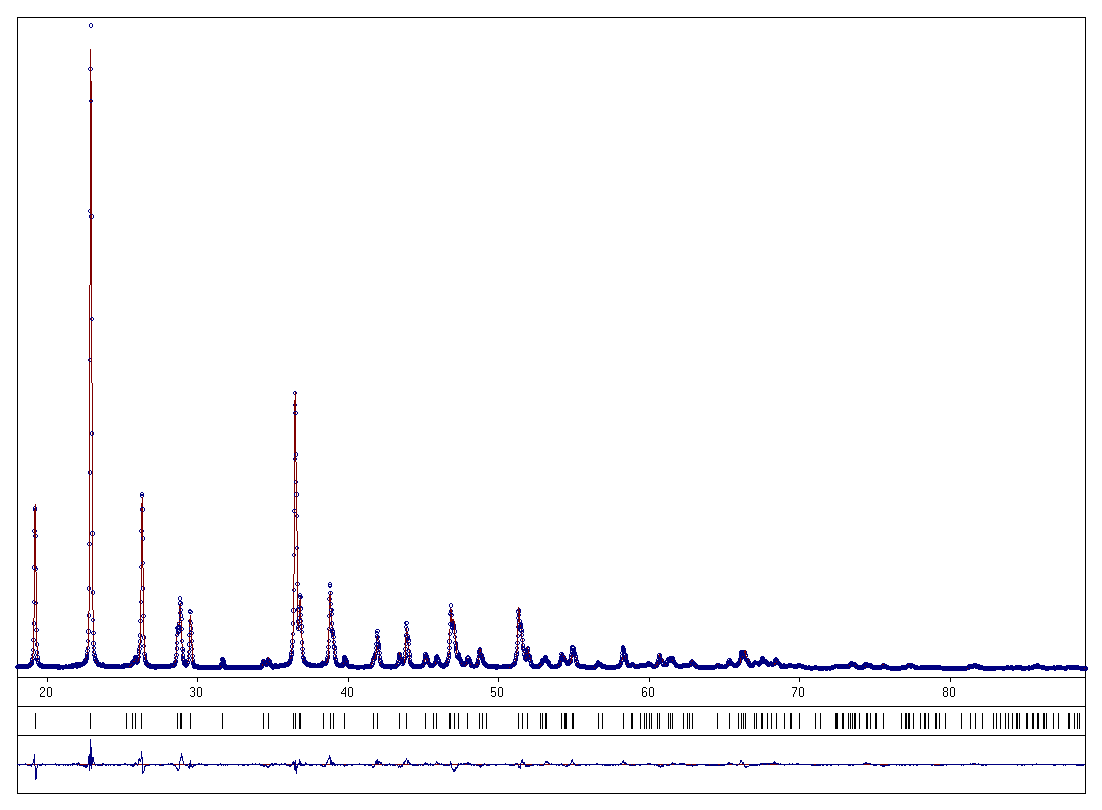


(b)


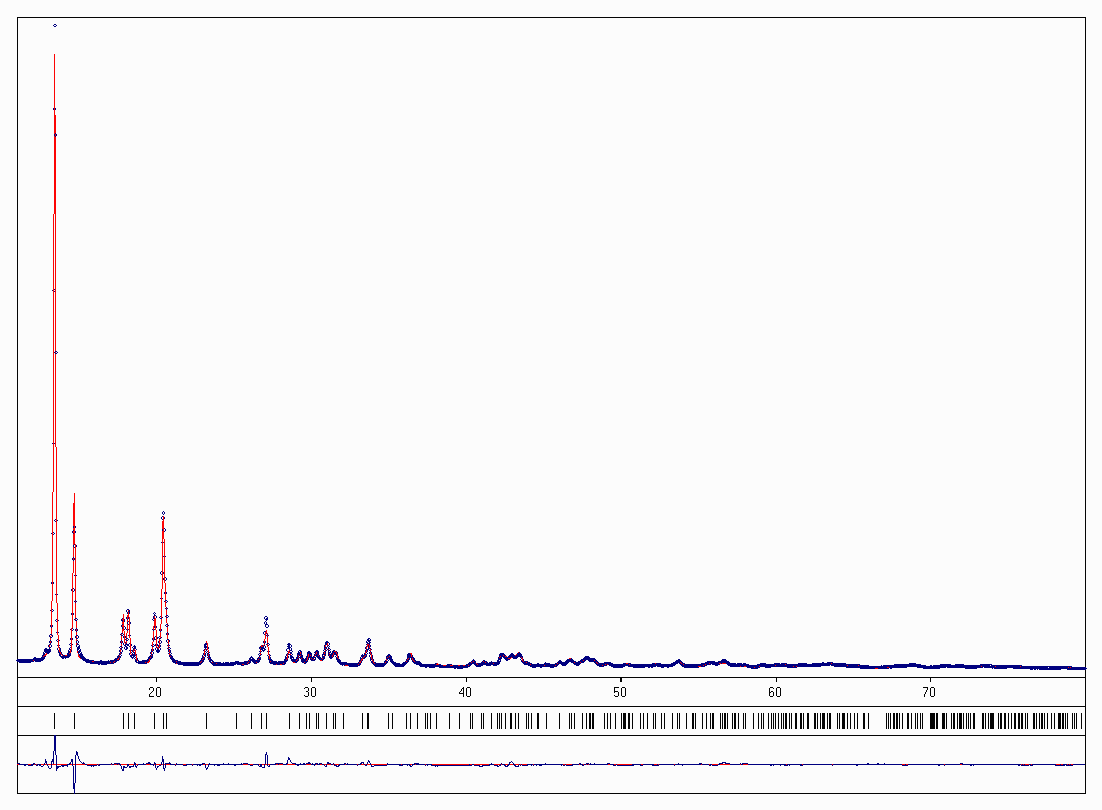


Supporting information

Table 1

Reflection list for VO(CH3COO)2

**h k l d Io/AT I(c)**

1 1 1 4.61028 7853 8410

3 1 0 3.87386 10000 9996

4 0 0 3.51635 34 25

0 0 2 3.46275 559 632

0 2 0 3.43854 111 104

3 1 1 3.38089 8312 8593

2 0 2 3.10659 3441 3979

2 2 0 3.08907 1210 1170

0 2 1 3.07982 256 218

1 1 2 3.02065 4742 5246

2 2 1 2.82116 302 318

5 1 0 2.60368 151 179

3 1 2 2.58169 927 1153

4 0 2 2.46727 457 439

4 2 0 2.45846 5845 6144

0 2 2 2.43993 1115 1129

5 1 1 2.43713 2345 2364

6 0 0 2.34423 66 94

4 2 1 2.31682 3383 3218

2 2 2 2.30514 1836 1832

1 3 0 2.26251 206 230

1 1 3 2.16247 790 924

1 3 1 2.15065 1356 1131

5 1 2 2.08103 767 955

3 3 0 2.05938 987 883

4 2 2 2.00461 923 931

3 1 3 1.98309 119 119

3 3 1 1.97396 463 381

6 0 2 1.94123 235 267

6 2 0 1.93693 1331 1498

7 1 0 1.92870 813 973

0 2 3 1.91663 896 904

1 3 2 1.89405 762 667

6 2 1 1.86535 792 917

7 1 1 1.85800 116 122

2 2 3 1.84918 100 107

5 3 0 1.77705 1697 1836

3 3 2 1.77001 1161 1159

8 0 0 1.75818 485 560

0 0 4 1.73138 270 322

5 1 3 1.72733 794 811

5 3 1 1.72129 209 156

0 4 0 1.71927 24 16

6 2 2 1.69044 860 968

7 1 2 1.68497 257 310

4 2 3 1.68288 187 231

2 0 4 1.68118 341 414

2 4 0 1.67009 117 111

0 4 1 1.66862 665 657

1 1 4 1.66715 800 814

2 4 1 1.62355 222 212

1 3 3 1.61585 81 108

5 3 2 1.58101 1018 965

3 1 4 1.58069 765 738

8 0 2 1.56768 150 188

8 2 0 1.56541 44 54

4 0 4 1.55330 331 359

0 2 4 1.54641 220 217

4 4 0 1.54454 29 27

0 4 2 1.53991 182 154

3 3 3 1.53676 55 52

8 2 1 1.52689 2 3

9 1 0 1.52397 379 471

7 3 0 1.51103 181 195

**h k l d Io/AT I(c)**

2 2 4 1.51032 428 448

4 4 1 1.50750 113 109

2 4 2 1.50427 383 335

9 1 1 1.48836 54 44

6 2 3 1.48382 212 249

7 1 3 1.48011 105 130

7 3 1 1.47630 311 376

5 1 4 1.44172 231 432

8 2 2 1.42642 466 397

4 2 4 1.41557 356 352

4 4 2 1.41058 748 707

5 3 3 1.40816 64 69

10 0 0 1.40654 389 455

9 1 2 1.39486 265 300

6 0 4 1.39271 360 395

6 4 0 1.38638 88 84

7 3 2 1.38492 519 482

0 4 3 1.37888 260 213

1 3 4 1.37497 264 204

1 5 0 1.36889 297 252

6 4 1 1.35941 81 80

2 4 3 1.35312 293 257

1 1 5 1.35155 28 24

1 5 1 1.34291 170 152

3 3 4 1.32525 63 171

3 5 0 1.31980 1 5

3 1 5 1.30424 142 148

10 0 2 1.30314 123 128

10 2 0 1.30184 29 30

3 5 1 1.29646 81 82

8 2 3 1.29562 18 19

9 3 0 1.29129 3 3

6 2 4 1.29084 144 160

7 1 4 1.28840 321 344

6 4 2 1.28706 237 246

0 2 5 1.28478 11 10

4 4 3 1.28371 29 28

10 2 1 1.27943 20 15

1 5 2 1.27302 249 175

9 1 3 1.27183 74 57

9 3 1 1.26941 85 76

7 3 3 1.26428 47 54

2 2 5 1.26386 17 19

11 1 0 1.25713 133 202

5 3 4 1.24010 115 149

11 1 1 1.23692 6 7

5 5 0 1.23563 7 8

8 0 4 1.23363 155 171

3 5 2 1.23326 184 202

8 4 0 1.22923 55 60

5 1 5 1.22283 96 90

0 4 4 1.21997 33 30

10 2 2 1.21857 55 53

5 5 1 1.21642 35 39

8 4 1 1.21032 71 110

9 3 2 1.20990 37 58

4 2 5 1.20676 107 147

2 4 4 1.20201 49 50

6 4 3 1.18852 46 51

11 1 2 1.18167 142 120

1 3 5 1.18131 116 100

1 5 3 1.17744 340 292

12 0 0 1.17212 39 46

5 5 2 1.16376 52 45

**h k l d Io/AT I(c)**

8 2 4 1.16117 77 69

8 4 2 1.15841 54 50

0 0 6 1.15425 171 155

4 4 4 1.15257 102 87

3 3 5 1.14933 34 29

0 6 0 1.14618 29 29

3 5 3 1.14576 21 22

9 1 4 1.14395 139 152

2 0 6 1.13901 49 51

7 3 4 1.13844 60 62

7 5 0 1.13498 1 1

1 1 6 1.13462 133 134

10 2 3 1.13396 128 128

2 6 0 1.13125 50 50

**h k l d Io/AT I(c)**

0 6 1 1.13080 51 51

9 3 3 1.12696 22 21

6 2 5 1.12667 74 71

7 1 5 1.12504 6 6

7 5 1 1.12004 48 53

11 3 0 1.11670 1 1

2 6 1 1.11646 61 64

12 0 2 1.11024 75 76

12 2 0 1.10943 38 39

3 1 6 1.10619 64 77

11 1 3 1.10404 108 145

11 3 1 1.10246 9 13

11 3 1 1.10246 9 13

Table 2

Reflection list for VO(OCH2CH2O)

**h k l d Iobs Iclc**

1 1 0 6.57261 9946 10000

1 1 -1 6.01285 3160 3223

1 1 1 4.95866 1173 1329

0 2 0 4.86727 1058 1199

0 0 2 4.76388 433 502

2 0 0 4.45511 1126 1173

0 2 1 4.33444 3896 4111

1 1 -2 4.29531 930 960

2 0 -2 3.82289 775 871

1 1 2 3.53063 166 111

0 2 2 3.40454 287 280

2 2 -1 3.32228 464 515

2 2 0 3.28631 1192 1139

1 1 -3 3.11929 873 699

1 3 0 3.04896 431 436

2 2 -2 3.00642 6 6

1 3 -1 2.98698 385 363

3 1 -1 2.94354 383 383

2 2 1 2.92828 83 82

2 0 2 2.88115 1062 1109

3 1 0 2.84079 218 224

1 3 1 2.82738 388 416

3 1 -2 2.78481 24 17

1 3 -2 2.68584 180 170

0 2 3 2.65978 561 595

1 1 3 2.65553 621 672

2 2 -3 2.55901 463 509

3 1 1 2.54455 1 1

2 2 2 2.47933 16 17

3 1 -3 2.46549 557 610

1 3 2 2.46448 33 36

0 4 0 2.43364 78 73

1 1 -4 2.40159 12 17

2 0 -4 2.39323 14 21

0 0 4 2.38194 1 2

0 4 1 2.35793 40 113

1 3 -3 2.31126 4 60

4 0 -2 2.27300 0 20

3 3 -1 2.23698 23 35

4 0 0 2.22755 168 233

3 1 2 2.19789 70 108

3 3 0 2.19087 117 161

0 4 2 2.16722 23 25

3 3 -2 2.16488 57 62

2 2 -4 2.14765 0 1

2 4 -1 2.14554 29 36

0 2 4 2.13949 2 3

2 4 0 2.13576 377 419

3 1 -4 2.12188 354 390

1 1 4 2.10621 123 125

1 3 3 2.10245 255 255

4 2 -1 2.09089 131 145

2 2 3 2.08167 657 754

4 2 -2 2.05949 88 104

2 4 -2 2.05295 23 27

3 3 1 2.04607 1 1

2 4 1 2.02754 0 0

4 2 0 2.02551 62 74

3 3 -3 2.00428 99 99

1 3 -4 1.96950 256 274

4 2 -3 1.94322 366 408

1 1 -5 1.93885 87 95

0 4 3 1.93171 1 1

4 0 -4 1.91144 216 217

1 5 0 1.90203 320 318

**h k l d Iobs Iclc**

2 0 4 1.89430 65 64

2 4 -3 1.89206 0 0

1 5 -1 1.88670 91 90

4 2 1 1.88720 0 0

3 1 3 1.88443 284 284

2 4 2 1.85916 61 58

3 3 2 1.85239 142 132

1 5 1 1.84447 8 8

4 0 2 1.83297 70 85

3 1 -5 1.82049 1 2

2 2 -5 1.81687 3 4

5 1 -1 1.81388 102 138

5 1 -2 1.81233 1 2

3 3 -4 1.80620 87 115

1 5 -2 1.80343 7 9

1 3 4 1.79650 49 60

4 2 -4 1.77917 47 54

0 2 5 1.77441 44 50

2 2 4 1.76531 56 61

5 1 0 1.75291 10 11

5 1 -3 1.74872 163 187

1 1 5 1.73796 33 36

1 5 2 1.73164 47 48

4 2 2 1.71537 86 91

2 4 -4 1.70638 263 272

0 4 4 1.70227 152 157

1 3 -5 1.68924 17 18

4 4 -1 1.67748 0 0

1 5 -3 1.67590 73 74

2 4 3 1.67271 19 18

4 4 -2 1.66114 11 10

3 3 3 1.65289 184 184

3 5 -1 1.64692 45 47

2 0 -6 1.64646 24 25

5 1 1 1.64624 2 2

4 4 0 1.64315 55 59

5 1 -4 1.64046 207 222

3 5 0 1.62826 93 82

3 1 4 1.62600 140 121

0 6 0 1.62242 3 2

1 1 -6 1.62075 178 152

3 5 -2 1.61751 78 65

3 3 -5 1.60923 41 36

5 3 -1 1.60466 36 31

4 2 -5 1.60327 39 34

5 3 -2 1.60359 0 0

0 6 1 1.59940 58 48

4 4 -3 1.59830 6 5

1 5 3 1.59096 45 33

0 0 6 1.58796 82 60

3 1 -6 1.57448 21 18

4 4 1 1.56669 1 1

3 5 1 1.56611 2 2

5 3 0 1.56199 109 99

2 2 -6 1.55964 2 2

5 3 -3 1.55902 65 61

1 3 5 1.55138 3 3

3 5 -3 1.54713 72 76

6 0 -2 1.54405 1 1

4 2 3 1.54129 154 162

0 6 2 1.53580 1 1

1 5 -4 1.53096 21 23

2 6 -1 1.52803 164 176

2 4 -5 1.52575 1 1

2 6 0 1.52448 17 18

**h k l d Iobs Iclc**

2 2 5 1.51962 10 11

5 1 2 1.51696 36 35

5 1 -5 1.51063 1 1

0 2 6 1.50965 6 6

4 0 -6 1.50418 35 36

4 4 -4 1.50321 168 172

0 4 5 1.50034 10 11

2 4 4 1.49483 85 86

2 6 -2 1.49349 2 2

6 0 0 1.48504 81 80

5 3 1 1.48509 0 0

2 6 1 1.48362 9 9

5 3 -4 1.48084 49 48

1 1 6 1.47643 34 35

3 5 2 1.47398 121 123

6 2 -2 1.47177 11 11

3 3 4 1.47019 6 6

1 3 -6 1.46630 72 77

4 4 2 1.46414 102 108

6 2 -1 1.46232 136 144

6 0 -4 1.45313 62 63

3 5 -4 1.45038 40 40

6 2 -3 1.44684 59 59

1 5 4 1.44535 12 12

0 6 3 1.44481 94 94

4 0 4 1.44057 5 5

4 2 -6 1.43712 15 14

3 3 -6 1.43177 80 77

2 6 -3 1.42799 130 122

6 2 0 1.42039 11 8

3 1 5 1.41863 18 13

2 6 2 1.41369 18 11

4 4 -5 1.39256 1 1

6 2 -4 1.39240 15 11

1 1 -7 1.39025 36 28

1 5 -5 1.38770 2 2

5 3 2 1.38811 34 28

5 3 -5 1.38325 35 32

5 1 3 1.38387 38 34

4 2 4 1.38134 18 17

2 0 6 1.38011 32 31

5 1 -6 1.37769 36 36

3 1 -7 1.37740 22 22

1 7 0 1.37401 65 70

1 7 -1 1.36820 59 63

3 5 3 1.36734 35 37

2 4 -6 1.36369 175 180

2 2 -7 1.35920 110 109

1 3 6 1.35685 59 57

6 2 1 1.35370 0 0

1 7 1 1.35184 8 8

4 4 3 1.35137 0 0

2 6 -4 1.34292 0 0

3 5 -5 1.34231 0 0

0 6 4 1.34092 6 6

5 5 -1 1.33965 23 24

5 5 -2 1.33903 3 4

2 4 5 1.33669 0 0

1 7 -2 1.33543 31 34

0 4 6 1.32989 122 131

4 6 -1 1.32870 36 39

2 2 6 1.32777 10 11

2 6 3 1.32633 71 76

4 6 -2 1.32054 16 17

6 2 -5 1.31773 16 16

6 0 2 1.31810 55 56

**h k l d Iobs Iclc**

5 5 0 1.31452 67 65

5 5 -3 1.31275 8 8

7 1 -2 1.31223 13 12

4 6 0 1.31144 1 1

3 3 5 1.31158 1 1

0 2 7 1.31082 59 57

1 5 5 1.30818 0 0

1 7 2 1.30548 18 18

6 4 -2 1.30378 9 9

7 1 -3 1.30158 22 23

7 1 -1 1.29835 69 73

6 4 -1 1.29720 4 4

4 2 -7 1.28952 69 71

1 3 -7 1.28905 70 73

4 6 -3 1.28830 97 99

6 4 -3 1.28635 2 2

5 3 3 1.28396 19 20

1 1 7 1.28199 3 3

1 7 -3 1.28109 26 27

4 4 -6 1.27951 20 20

5 3 -6 1.27903 2 2

3 3 -7 1.27879 60 62

6 0 -6 1.27430 6 6

6 2 2 1.27228 0 0

4 6 1 1.27157 0 0

7 1 -4 1.26811 25 26

3 7 -1 1.26801 17 17

6 4 0 1.26766 41 44

5 5 1 1.26770 4 5

5 5 -4 1.26505 29 32

7 1 0 1.26214 63 69

3 7 0 1.25943 42 47

3 5 4 1.25839 3 3

5 1 4 1.25808 0 0

1 5 -6 1.25595 37 44

3 7 -2 1.25444 0 0

5 1 -7 1.25241 7 8

3 1 6 1.25237 45 56

2 6 -5 1.24939 7 8

6 4 -4 1.24764 54 68

1 7 3 1.24193 19 22

4 2 5 1.24107 14 16

2 0 -8 1.23910 6 6

4 4 4 1.23967 12 13

4 6 -4 1.23692 0 0

0 6 5 1.23532 4 5

3 5 -6 1.23404 25 27

6 2 -6 1.23275 0 0

2 6 4 1.23224 0 0

3 7 1 1.23000 1 1

7 3 -2 1.22613 5 7

2 4 -7 1.22359 0 0

3 7 -3 1.22074 48 68

3 1 -8 1.21915 3 5

6 4 1 1.21957 1 1

7 3 -3 1.21743 2 2

7 1 -5 1.21675 0 0

0 8 0 1.21682 38 55

1 1 -8 1.21615 5 7

7 3 -1 1.21478 31 45

4 6 2 1.21488 11 17

1 7 -4 1.21275 4 6

7 1 1 1.20886 0 0

0 8 1 1.20701 0 0

5 5 2 1.20576 23 31
